# Supplementary material
Source: PubMed Central journal article supplement (PMC4004261)
Supplement: ci500077v_si_001.pdf [file ci500077v_si_001.pdf]

Supporting Information

**Looking Back To The Future: Predicting *In vivo* Efficacy of Small Molecules  
Versus *Mycobacterium tuberculosis***

Sean Ekins,<sup>1,2\*</sup> Richard Pottorf,<sup>3</sup> Robert C. Reynolds,<sup>4</sup> Antony J. Williams,<sup>5</sup> Alex M.  
Clark<sup>6</sup> and Joel S. Freundlich<sup>3,7\*</sup>

<sup>1</sup>Collaborative Drug Discovery, 1633 Bayshore Highway, Suite 342, Burlingame, CA 94010, USA.

<sup>2</sup> Collaborations in Chemistry, 5616 Hilltop Needmore Road, Fuquay-Varina, NC 27526, USA.

<sup>3</sup>Department of Pharmacology & Physiology, Rutgers University – New Jersey Medical School, 185 South Orange Avenue, Newark, NJ 07103, USA.

<sup>4</sup>University of Alabama at Birmingham, College of Arts and Sciences, Department of Chemistry, 1530 3<sup>rd</sup> Avenue South, Birmingham, AL 35294-1240, USA.

<sup>5</sup>Royal Society of Chemistry, 904 Tamaras Circle, Wake Forest, NC 27587, USA.

<sup>6</sup>Molecular Materials Informatics, 1900 St. Jacques #302, Montreal, Quebec, Canada H3J 2S1

<sup>7</sup>Department of Medicine, Center for Emerging and Reemerging Pathogens, Rutgers University – New Jersey Medical School, 185 South Orange Avenue, Newark, NJ 07103, USA.

\*To whom correspondence should be addressed. E-mail: [ekinssean@yahoo.com](mailto:ekinssean@yahoo.com)

Email [freundjs@njms.rutgers.edu](mailto:freundjs@njms.rutgers.edu) PhoneTel.(973) 972-7165 Fax. (973) 972-7950

Running title: Predicting in vivo efficacy

**Table S1.** Curated mouse in vivo TB data and molecule structures. ND = no data. (see excel file)

**Table S2.** Descriptors for training set molecules. (see excel file)

**Table S3.** Predictions for GSK 177 compounds (see excel file)

**Table S4.** Mean (Standard Deviation) of molecular descriptors for *in vivo* N= 177 *in vitro* actives from GSK. We compared predicted consensus in vivo actives and inactives for statistical differences. MWT = molecular weight, HBD = hydrogen bond donor, HBA = Hydrogen bond acceptor, FPSA = Fractional polar surface area, RBN = rotatable bond number. \* p < 0.05. \*\* p < 0.0001 (Fractional polar surface area = Total partially positively charged molecular surface area divided by the total molecular surface area).

|           | MWT            | AlogP       | HBD         | HBA          | Num Rings   | Num Arom<br>Rings | FPSA          | RBN         |
|-----------|----------------|-------------|-------------|--------------|-------------|-------------------|---------------|-------------|
| All       |                |             |             |              |             |                   |               |             |
| (N =177)  | 357.65 ± 64.52 | 3.37 ± 1.06 | 1.14 ± 1.05 | 4.21 ± 1.68  | 3.52 ± 0.89 | 2.89 ± 0.78       | 0.24 ± 0.09   | 4.90 ± 2.15 |
| Active    |                |             |             |              |             |                   |               |             |
| (N = 24)  | 362.90 ± 55.73 | 3.43 ± 1.11 | 1.20 ± 0.66 | 3.29 ± 1.16  | 3.29 ± 0.75 | 2.67 ± 0.70       | 0.19 ± 0.05   | 4.50 ± 1.14 |
| Inactive  |                |             |             |              |             |                   |               |             |
| (N = 153) | 356.83 ± 65.92 | 3.36 ± 1.06 | 1.14 ± 1.10 | 4.36 ± 1.70* | 3.55 ± 0.90 | 2.92 ± 0.78       | 0.24 ± 0.09** | 4.96 ± 2.27 |

**Table S5** GSK 24 consensus predicted compounds with maximum Tanimoto similarity to the training set, TB Mobile predictions and clustering with the TB Mobile dataset in Discovery Studio to infer the target/s.

| Molecule                                                                           | Molecule Name | Maximum Tanimoto Similarity to a training set molecule using MDL fingerprints (closest molecule) | TB Mobile predicted target/s (top 2 molecules) | Clustering with TB Mobile dataset - predicted target/s                     |
|------------------------------------------------------------------------------------|---------------|--------------------------------------------------------------------------------------------------|------------------------------------------------|----------------------------------------------------------------------------|
| 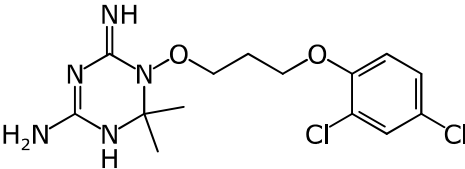  | BRL-51091AM   | 0.59 (ITR 103)                                                                                   | Emb A, Emb B, Emb C<br>InhA, DnaE2             | Cluster 19<br>DfrA                                                         |
|  | GR135487X     | 0.56<br>(Hoggarth4compound4456)                                                                  | Rv1885, SahH                                   | Cluster 12<br>(no TB Mobile compounds)<br>Close clusters are CysH and DapA |

|                                                                                    |            |                           |      |                                                                                  |
|------------------------------------------------------------------------------------|------------|---------------------------|------|----------------------------------------------------------------------------------|
| 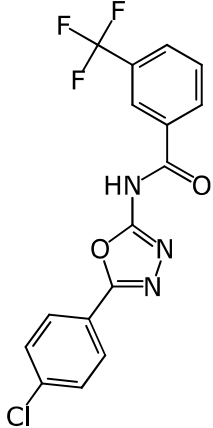  | GSK130506A | 0.67 (6q Sriram JMC 2006) | InhA | Cluster 32<br>(no TB Mobile<br>compounds)<br>Close cluster are<br>Mmp13 and InhA |
|  | GSK254610A | 0.62 (Thioridazine)       | InhA | Cluster 90<br>Rv3161c and<br>Rv1211                                              |

|                                                                                    |            |                                                                           |                                   |                                                                            |
|------------------------------------------------------------------------------------|------------|---------------------------------------------------------------------------|-----------------------------------|----------------------------------------------------------------------------|
| 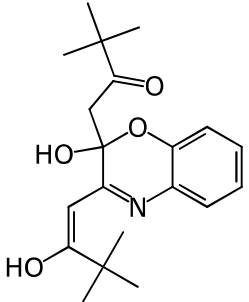  | GSK262906A | 0.54 (Clarithromycin)                                                     | AroD, KasA                        | Cluster 27<br>(no TB Mobile<br>compounds)<br>Close cluster<br>Mca and CysH |
|   | GSK498315A | 0.72 (Abrahams IP3)                                                       | QcrB                              | Cluster 21<br>QcrB                                                         |
|   | GSK762874A | 0.74 (Abrahams IP3)                                                       | QcrB                              | Cluster 21<br>QcrB                                                         |
|  | GSK937733A | 0.98 (Remunian 3)<br>Note if stereo chemistry was<br>shown this would = 1 | Mmpl3 (in<br>software<br>dataset) | Cluster 39<br>InhA, DprE and<br>Mmpl3                                      |

|                                                                                    |             |                   |                                   |                           |
|------------------------------------------------------------------------------------|-------------|-------------------|-----------------------------------|---------------------------|
| 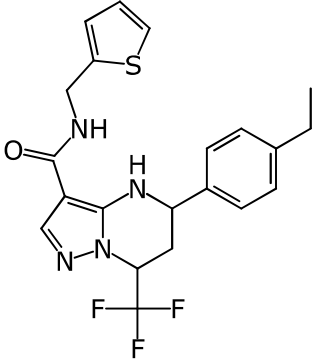  | GSK1589671A | 0.92 (yokokawa 9) | Mmpl3                             | Cluster 21<br>QcrB        |
|   | GSK1589673A | 0.86 (Remunian 3) | Mmpl3 (in<br>software<br>dataset) | Cluster 59<br>Mmpl3       |
|  | GSK1750922A | 0.82 (sudoterb)   | InhA                              | Cluster 77<br>InhA, Mmpl3 |

|                                                                                    |             |                     |      |                    |
|------------------------------------------------------------------------------------|-------------|---------------------|------|--------------------|
| 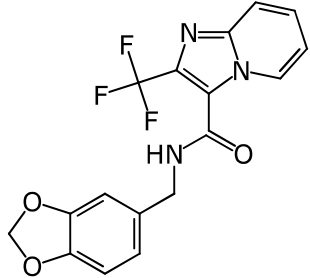  | GSK1829671A | 0.77 (Abrahams IP3) | QcrB | Cluster 21<br>QcrB |
|   | GSK1829674A | 0.88 (Abrahams IP3) | QcrB | Cluster 21<br>QcrB |
|   | GSK1829676A | 0.82 (Abrahams IP3) | QcrB | Cluster 21<br>QcrB |
|  | GSK1829727A | 0.88 (Abrahams IP3) | QcrB | Cluster 21<br>QcrB |



|                                                                                     |             |                     |      |                    |
|-------------------------------------------------------------------------------------|-------------|---------------------|------|--------------------|
| 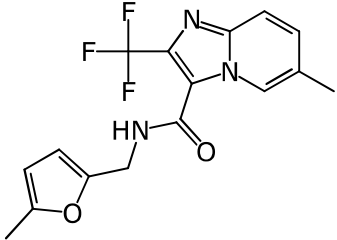   | GSK1829728A | 0.88 (Abrahams IP3) | QcrB | Cluster 21<br>QcrB |
|    | GSK1829729A | 0.90 (Abrahams IP3) | QcrB | Cluster 21<br>QcrB |
|   | GSK1829732A | 0.81 (Abrahams IP3) | QcrB | Cluster 21<br>QcrB |
|  | GSK1829736A | 0.93 (Abrahams IP3) | QcrB | Cluster 21<br>QcrB |

|                                                                                    |             |                     |                                  |                    |
|------------------------------------------------------------------------------------|-------------|---------------------|----------------------------------|--------------------|
| 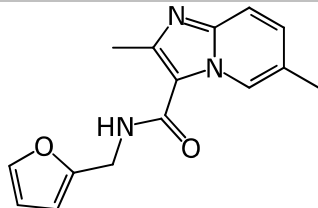  | GSK1829819A | 0.83 (Abrahams IP3) | QcrB                             | Cluster 21<br>QcrB |
|   | GSK1829820A | 0.84 (Abrahams IP3) | QcrB<br>(in software<br>dataset) | Cluster 21<br>QcrB |
|   | GSK1985270A | 0.63 (Remunian 4)   | InhA                             | Cluster 8<br>AtpE  |
|  | GW713556X   | 0.68 (ketoconazole) | Glf                              | Cluster 89<br>InhA |

|                                                                                                                                                                                                                                                                                                                                                                                                                                                                                                                                          |           |                     |      |                                   |
|------------------------------------------------------------------------------------------------------------------------------------------------------------------------------------------------------------------------------------------------------------------------------------------------------------------------------------------------------------------------------------------------------------------------------------------------------------------------------------------------------------------------------------------|-----------|---------------------|------|-----------------------------------|
| 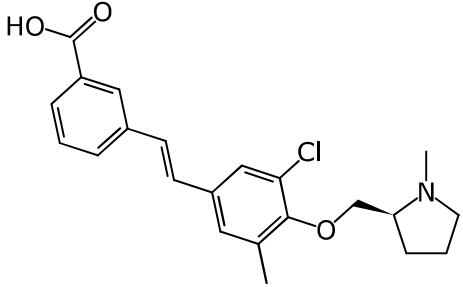 <p>The chemical structure of SB-829405 consists of a central trans-stilbene-like core. One phenyl ring is substituted with a carboxylic acid group (-COOH) at the para position. The other phenyl ring is substituted with a chlorine atom (-Cl) at the ortho position, a methyl group (-CH<sub>3</sub>) at the meta position, and a 1-methylpyrrolidine-2-ylmethoxy group (-OCH<sub>2</sub>CH<sub>2</sub>N(CH<sub>3</sub>)) at the para position.</p> | SB-829405 | 0.69 (ketoconazole) | InhA | Cluster 75<br>GyrA, RpoB,<br>MurD |
|------------------------------------------------------------------------------------------------------------------------------------------------------------------------------------------------------------------------------------------------------------------------------------------------------------------------------------------------------------------------------------------------------------------------------------------------------------------------------------------------------------------------------------------|-----------|---------------------|------|-----------------------------------|

**Figure S1.** Average differences and trends between molecular descriptors versus year of publication of the source paper (as a surrogate for year of discovery) to illustrate historical progress and temperospatial effects (left plot = smoothed data; right plot = individual data points; red = active *in vivo*; blue = inactive *in vivo*). A, AlogP; B, MWT; C, rotatable bond number; D, number of rings; E, number of aromatic rings; F, hydrogen bond acceptors; G, hydrogen bond donors; H, fractional polar surface area.

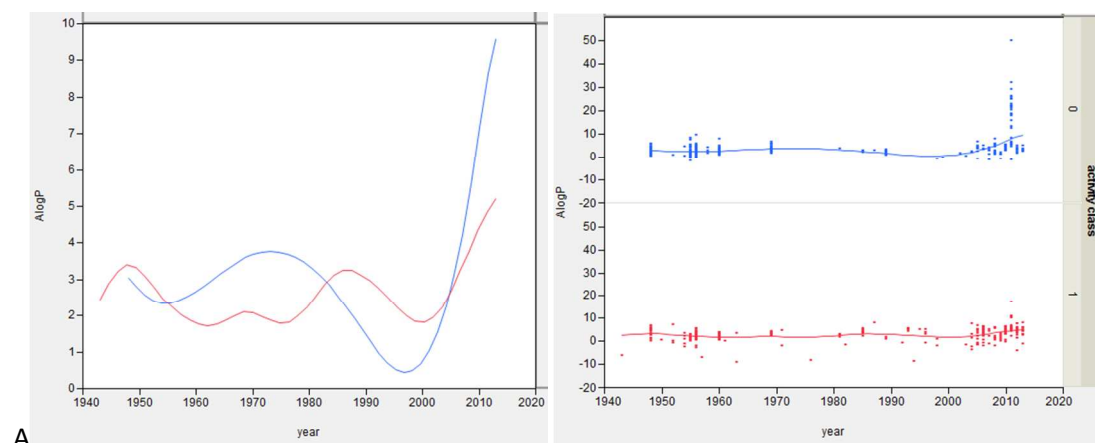

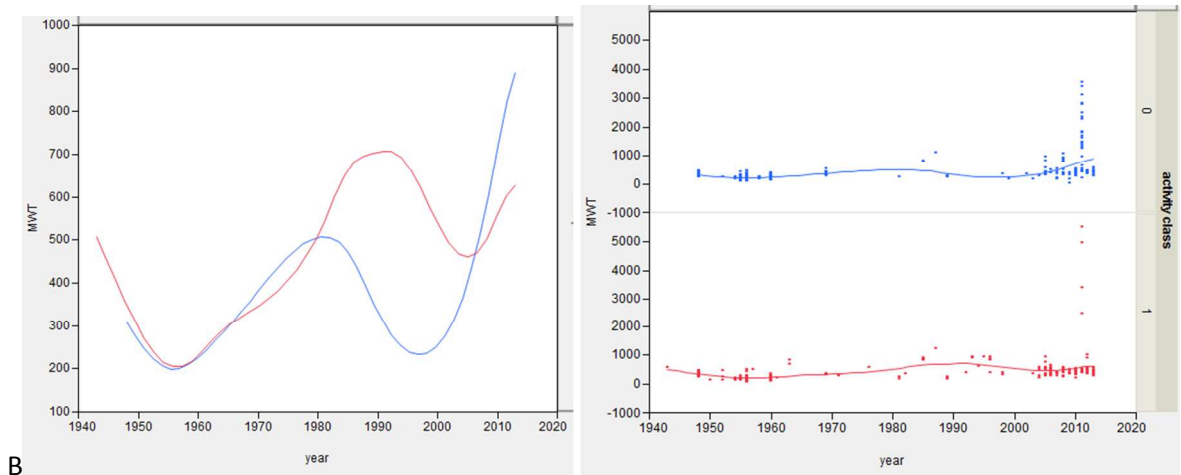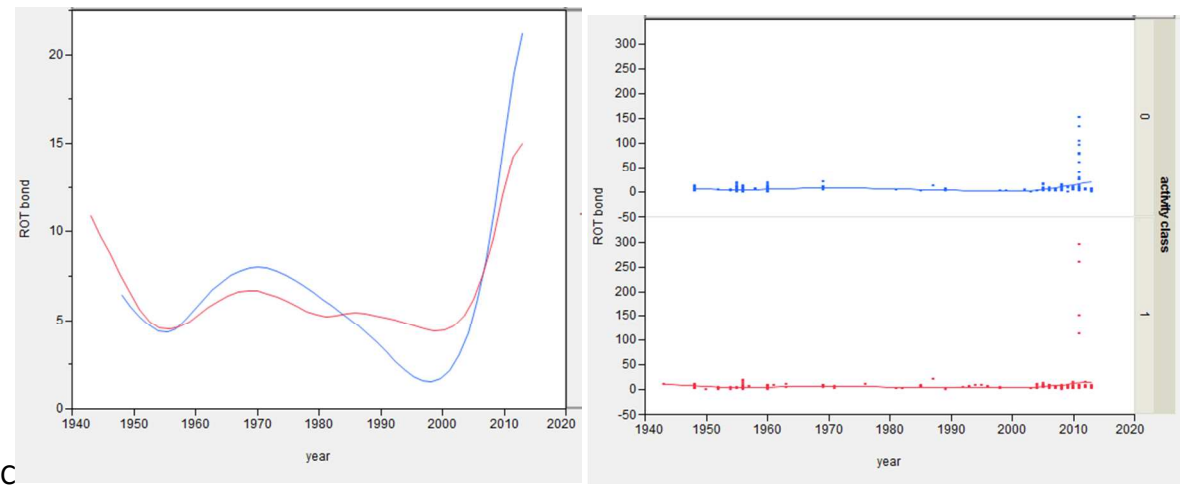

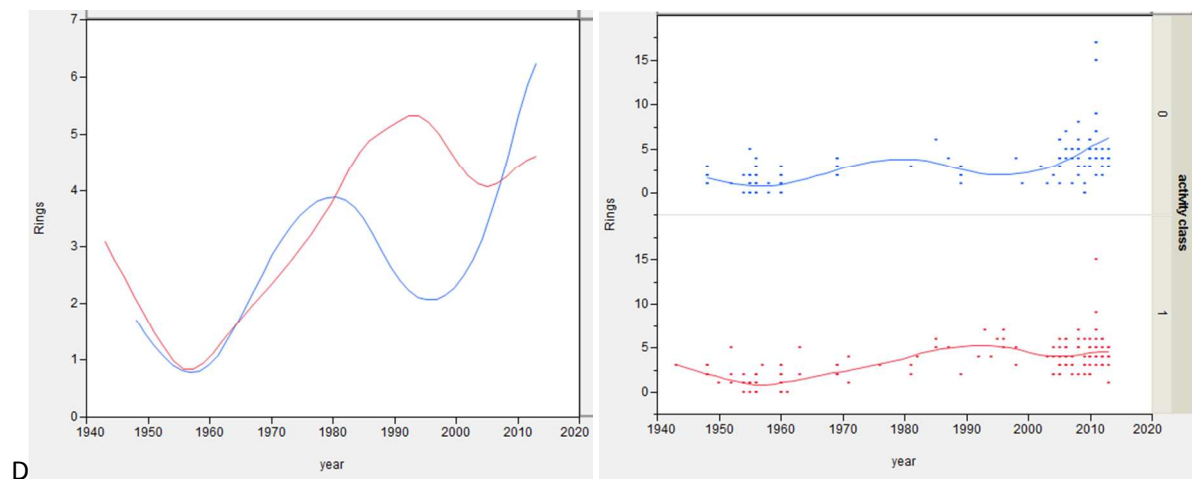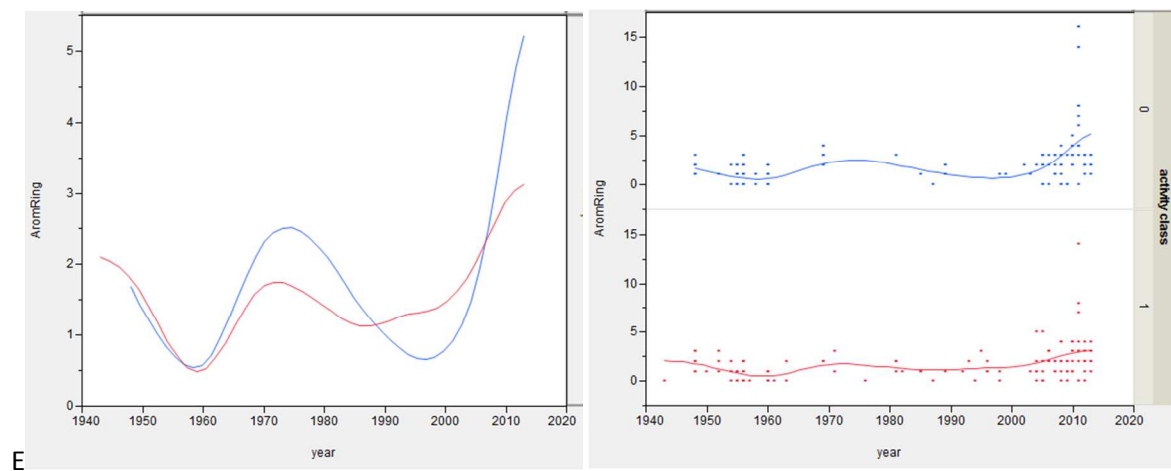

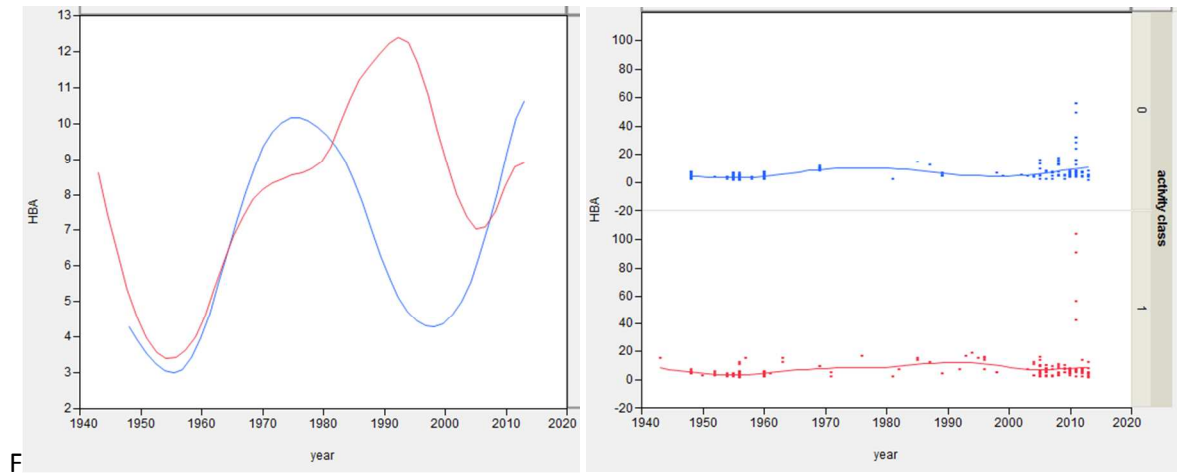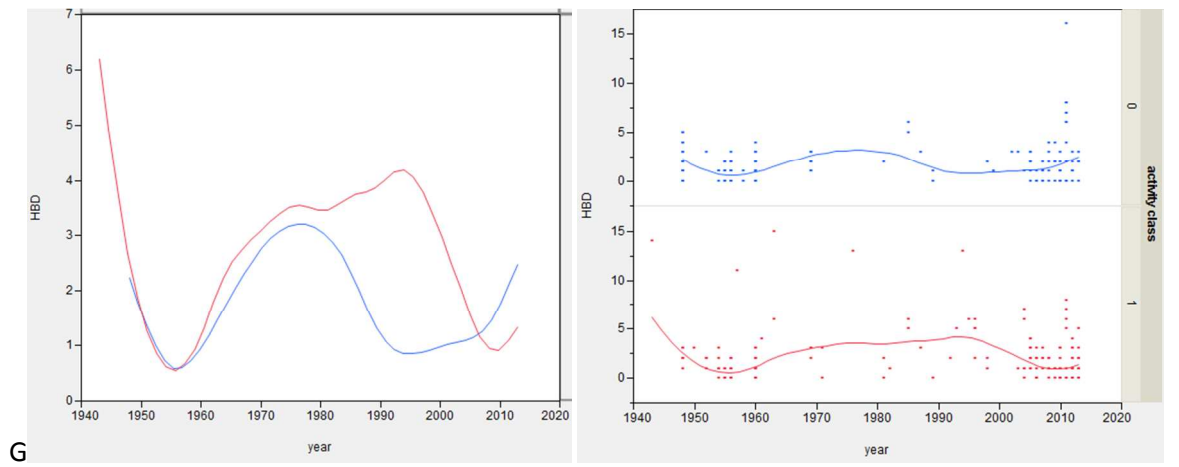

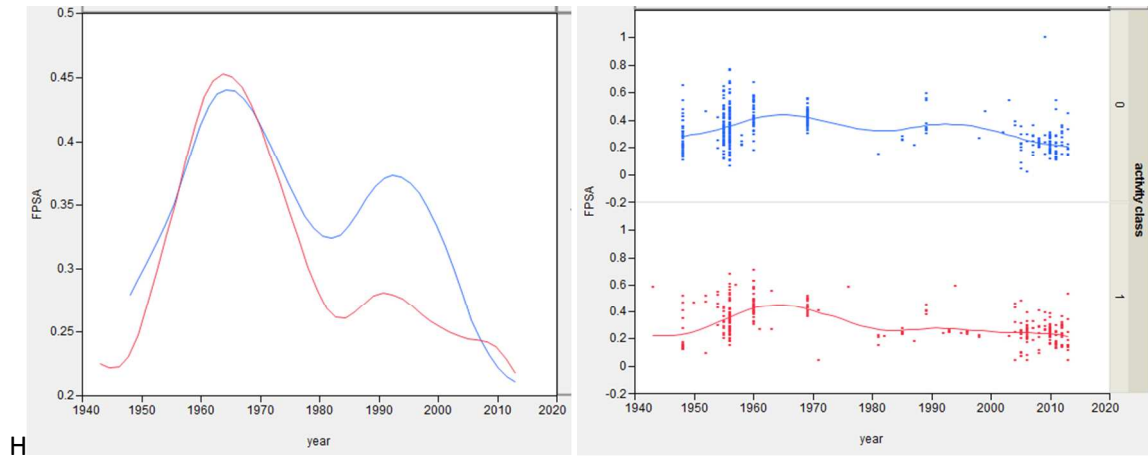

H



**Figure S2.** Mouse *in vivo* *Mtb* activity Bayesian model: good features from FCFP\_6.

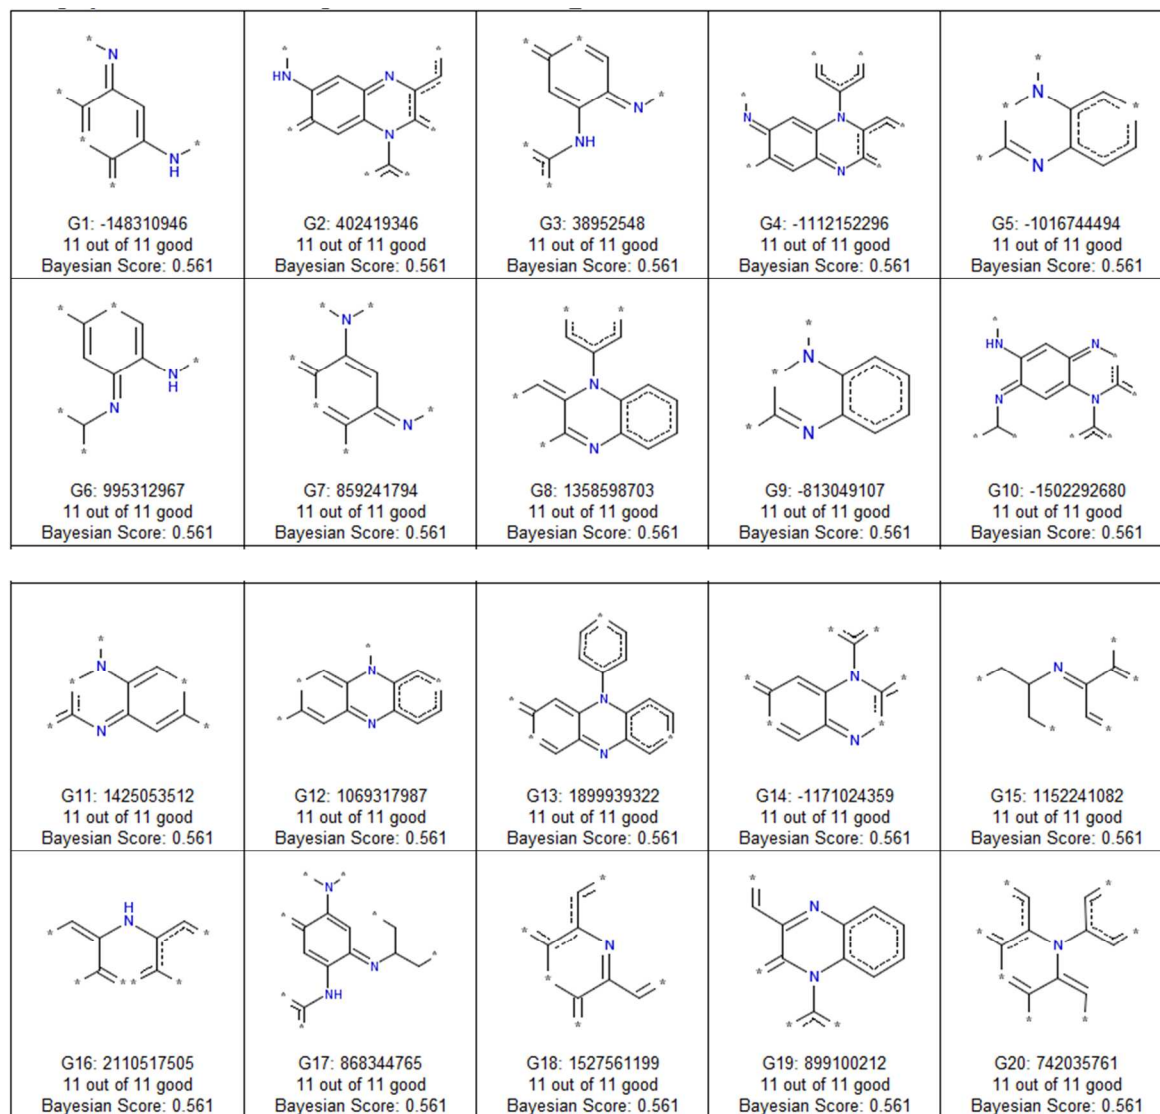

**Supplemental Figure S3.** Mouse *in vivo* *Mtb* activity Bayesian model: bad features from FCFP\_6.

|                                                                                                                                                           |                                                                                                                                                            |                                                                                                                                                          |                                                                                                                                                            |                                                                                                                                                            |
|-----------------------------------------------------------------------------------------------------------------------------------------------------------|------------------------------------------------------------------------------------------------------------------------------------------------------------|----------------------------------------------------------------------------------------------------------------------------------------------------------|------------------------------------------------------------------------------------------------------------------------------------------------------------|------------------------------------------------------------------------------------------------------------------------------------------------------------|
| 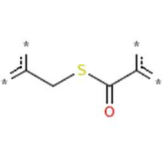 <p>B1: 1569499252<br/>0 out of 10 good<br/>Bayesian Score: -1.843</p>   |  <p>B2: -935558029<br/>0 out of 10 good<br/>Bayesian Score: -1.843</p>    |  <p>B3: 1713697850<br/>0 out of 10 good<br/>Bayesian Score: -1.843</p>  |  <p>B4: -1638460559<br/>0 out of 10 good<br/>Bayesian Score: -1.843</p>  |  <p>B5: -1630517516<br/>0 out of 9 good<br/>Bayesian Score: -1.755</p>  |
|  <p>B6: -1539730963<br/>0 out of 9 good<br/>Bayesian Score: -1.755</p>   |  <p>B7: -980712074<br/>0 out of 8 good<br/>Bayesian Score: -1.659</p>     |  <p>B8: -1877850085<br/>0 out of 7 good<br/>Bayesian Score: -1.552</p>  |  <p>B9: 368675221<br/>0 out of 7 good<br/>Bayesian Score: -1.552</p>     |  <p>B10: -1878095589<br/>0 out of 7 good<br/>Bayesian Score: -1.552</p> |
|  <p>B11: -1674330733<br/>0 out of 7 good<br/>Bayesian Score: -1.552</p>  |  <p>B12: -447202965<br/>1 out of 14 good<br/>Bayesian Score: -1.440</p>   |  <p>B13: -1931998982<br/>0 out of 6 good<br/>Bayesian Score: -1.433</p> |  <p>B14: 1267353621<br/>0 out of 6 good<br/>Bayesian Score: -1.433</p>   |  <p>B15: -541372719<br/>0 out of 6 good<br/>Bayesian Score: -1.433</p>  |
|  <p>B16: -484806247<br/>0 out of 6 good<br/>Bayesian Score: -1.433</p> |  <p>B17: -1230639123<br/>0 out of 6 good<br/>Bayesian Score: -1.433</p> |  <p>B18: 385180118<br/>0 out of 6 good<br/>Bayesian Score: -1.433</p> |  <p>B19: -731926398<br/>0 out of 6 good<br/>Bayesian Score: -1.433</p> |  <p>B20: 215090317<br/>0 out of 6 good<br/>Bayesian Score: -1.433</p> |

**Figure S4.** Mouse *in vivo* *Mtb* activity Bayesian model after removal of Clofazimine and 10 analogs from the dataset: good features from FCFP\_6. ROC score was -0.76, 5 fold cross validation ROC score was 0.73 (Sensitivity 73.8%, Specificity 87.1%, Concordance 81.0%).

|                                                                                                                                                           |                                                                                                                                                          |                                                                                                                                                           |                                                                                                                                                            |                                                                                                                                                             |
|-----------------------------------------------------------------------------------------------------------------------------------------------------------|----------------------------------------------------------------------------------------------------------------------------------------------------------|-----------------------------------------------------------------------------------------------------------------------------------------------------------|------------------------------------------------------------------------------------------------------------------------------------------------------------|-------------------------------------------------------------------------------------------------------------------------------------------------------------|
| 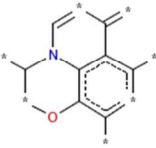 <p>G1: -2005147743<br/>10 out of 10 good<br/>Bayesian Score: 0.573</p>  |  <p>G2: -2004235128<br/>10 out of 10 good<br/>Bayesian Score: 0.573</p> |  <p>G3: 1034227702<br/>10 out of 10 good<br/>Bayesian Score: 0.573</p>   |  <p>G4: -1978061625<br/>9 out of 9 good<br/>Bayesian Score: 0.565</p>    |  <p>G5: 1286357304<br/>8 out of 8 good<br/>Bayesian Score: 0.556</p>     |
|  <p>G6: -113172951<br/>8 out of 8 good<br/>Bayesian Score: 0.556</p>     |  <p>G7: 961495530<br/>8 out of 8 good<br/>Bayesian Score: 0.556</p>     |  <p>G8: -1123453709<br/>8 out of 8 good<br/>Bayesian Score: 0.556</p>    |  <p>G9: 1663029624<br/>8 out of 8 good<br/>Bayesian Score: 0.556</p>     |  <p>G10: 1290319302<br/>8 out of 8 good<br/>Bayesian Score: 0.556</p>    |
|  <p>G11: -1393016230<br/>8 out of 8 good<br/>Bayesian Score: 0.556</p>  |  <p>G12: 1410483689<br/>8 out of 8 good<br/>Bayesian Score: 0.556</p>  |  <p>G13: -981942242<br/>8 out of 8 good<br/>Bayesian Score: 0.556</p>   |  <p>G14: 2007653834<br/>7 out of 7 good<br/>Bayesian Score: 0.545</p>   |  <p>G15: -590822321<br/>7 out of 7 good<br/>Bayesian Score: 0.545</p>   |
|  <p>G16: -1976051885<br/>7 out of 7 good<br/>Bayesian Score: 0.545</p> |  <p>G17: 1770508030<br/>7 out of 7 good<br/>Bayesian Score: 0.545</p> |  <p>G18: -2044901942<br/>6 out of 6 good<br/>Bayesian Score: 0.530</p> |  <p>G19: -1586692583<br/>6 out of 6 good<br/>Bayesian Score: 0.530</p> |  <p>G20: -1428118135<br/>6 out of 6 good<br/>Bayesian Score: 0.530</p> |

**Figure S5.** Mouse *in vivo* *Mtb* activity Bayesian model after removal of Clofazimine and 10 analogs from the dataset: bad features from FCFP\_6. ROC score was -0.76, 5 fold cross validation ROC score was 0.73 (Sensitivity 73.8%, Specificity 87.1%, Concordance 81.0%).

|                                                                                                                                                      |                                                                                                                                                     |                                                                                                                                                     |                                                                                                                                                     |                                                                                                                                                       |
|------------------------------------------------------------------------------------------------------------------------------------------------------|-----------------------------------------------------------------------------------------------------------------------------------------------------|-----------------------------------------------------------------------------------------------------------------------------------------------------|-----------------------------------------------------------------------------------------------------------------------------------------------------|-------------------------------------------------------------------------------------------------------------------------------------------------------|
| 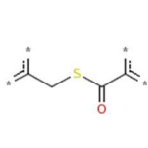<br>B1: 1569499252<br>0 out of 10 good<br>Bayesian Score: -1.825    | <br>B2: -93558029<br>0 out of 10 good<br>Bayesian Score: -1.825    | <br>B3: 1713697850<br>0 out of 10 good<br>Bayesian Score: -1.825   | <br>B4: -1638460559<br>0 out of 10 good<br>Bayesian Score: -1.825  | <br>B5: -1630517516<br>0 out of 9 good<br>Bayesian Score: -1.737    |
| <br>B6: -1539730963<br>0 out of 9 good<br>Bayesian Score: -1.737    | <br>B7: -980712074<br>0 out of 8 good<br>Bayesian Score: -1.641    | <br>B8: -1877850085<br>0 out of 7 good<br>Bayesian Score: -1.535   | <br>B9: 368675221<br>0 out of 7 good<br>Bayesian Score: -1.535     | <br>B10: -1674330733<br>0 out of 7 good<br>Bayesian Score: -1.535   |
| <br>B11: -1878095589<br>0 out of 7 good<br>Bayesian Score: -1.535  | <br>B12: -447202965<br>1 out of 14 good<br>Bayesian Score: -1.421 | <br>B13: 541372719<br>0 out of 6 good<br>Bayesian Score: -1.416   | <br>B14: 215090317<br>0 out of 6 good<br>Bayesian Score: -1.416   | <br>B15: 731926398<br>0 out of 6 good<br>Bayesian Score: -1.416    |
| <br>B16: -1931998982<br>0 out of 6 good<br>Bayesian Score: -1.416 | <br>B17: 385180118<br>0 out of 6 good<br>Bayesian Score: -1.416  | <br>B18: -484806247<br>0 out of 6 good<br>Bayesian Score: -1.416 | <br>B19: 1267353621<br>0 out of 6 good<br>Bayesian Score: -1.416 | <br>B20: -1230639123<br>0 out of 6 good<br>Bayesian Score: -1.416 |

**Figure S6.** Molecules from very recent and historic publications used as a test set for the machine learning models.

| Molecule                                                                                                                                        | Name |
|-------------------------------------------------------------------------------------------------------------------------------------------------|------|
| 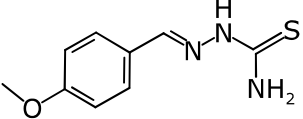 <chem>COC1=CC=C(C=C1)/C=N/N=C(S)N</chem>                      | 1070 |
|  <chem>COC1=CC=C(C=C1)CN/N=C(S)N</chem>                        | 1493 |
|  <chem>N=C(S)N/N=C/c1ccc([N+](=O)[O-])cc1</chem>               | 2403 |
|  <chem>CC(O)C(NC(=O)C(Cl)Cl)C(O)c1ccc([N+](=O)[O-])cc1</chem> | 2406 |
|  <chem>NC(=O)c1ccncc1</chem>                                 | 2875 |

|                                                                                     |                 |
|-------------------------------------------------------------------------------------|-----------------|
| 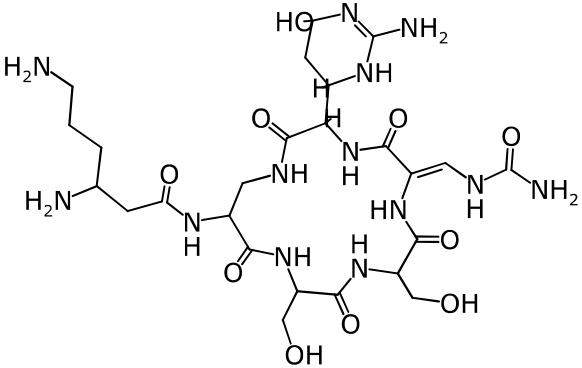   | <p>viomycin</p> |
|    | <p>neomycin</p> |
|  | <p>PCIH</p>     |

|                                                                                                                                        |             |
|----------------------------------------------------------------------------------------------------------------------------------------|-------------|
| 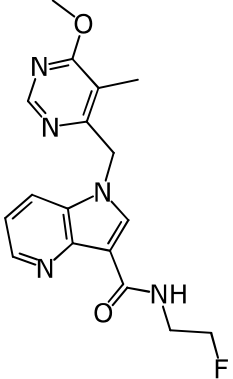 <chem>Cc1nc(OC)cnc1CN2C3=CC=NC=C3C(=O)NCCCF</chem>   | cpd 3       |
|  <chem>Cc1nc(OC)cnc1CN2C3=CC=NC=C3C(=O)NCC1CC1</chem> | cpd 4       |
|  <chem>Cc1c(C)c[nH]c1C(=O)N2CCCCC2</chem>            | indoleamide |

**Figure S7.** GSK *in vitro* active compounds and coverage of *Mtb in vivo* space. A. Overlap of GSK compounds (blue) with 773-molecule TB *in vivo* dataset (yellow) PCA. 3PCs explain 86.4% of variance. B. PCA of 24 GSK Consensus actives (yellow) and TB *in vivo* data (blue). 3 PCs explain 87% of variance. Consensus actives (yellow) are buried in the major cluster of *in vivo* data.

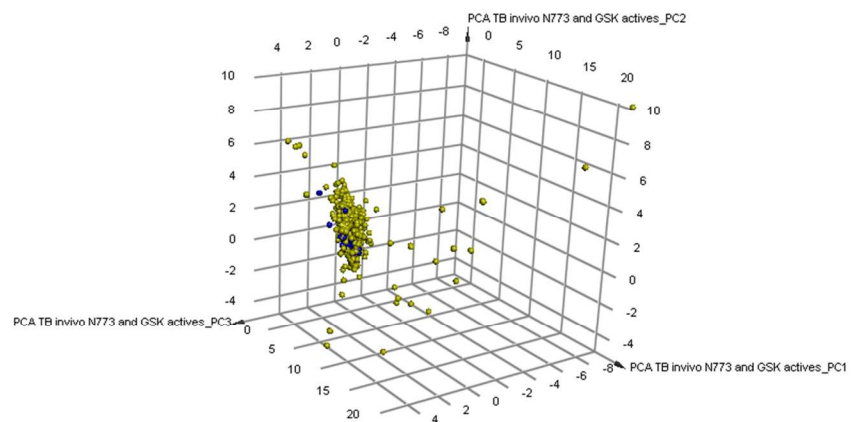

A

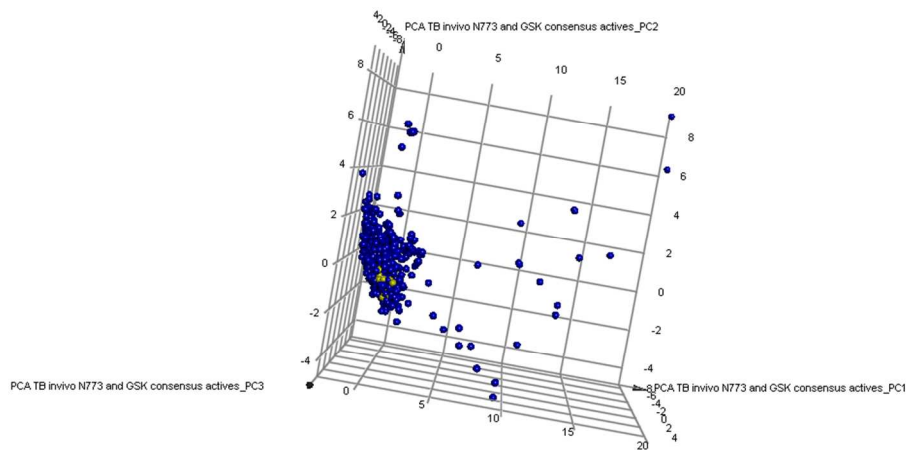

B



**Figure S8.** 2D Plot of AlogP98 and PSA for predicting human intestinal absorption and blood brain barrier penetration (BBB) in Discovery Studio A. *in vivo* dataset; B. GSK 177 cpds. Shown are 95% (blue, green) and 99% (magenta or red) confidence ellipses for human intestinal absorption and BBB, respectively.

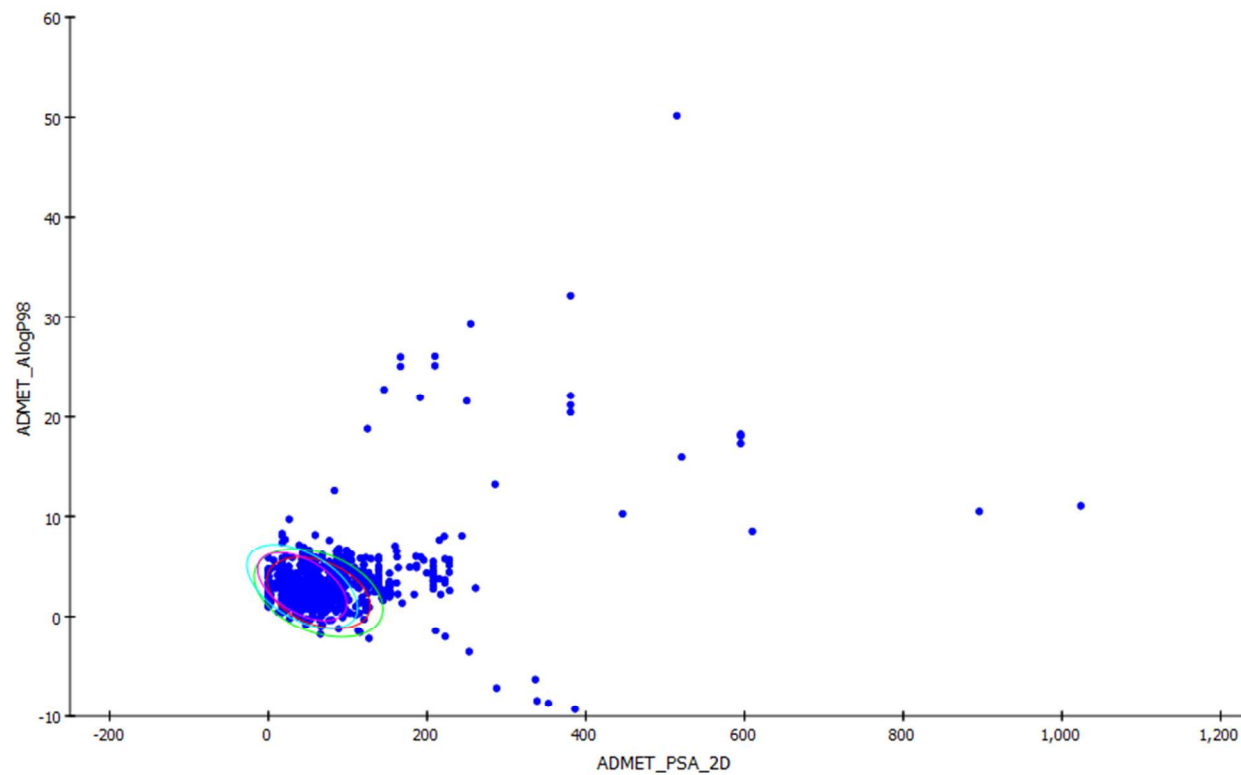

**A.**

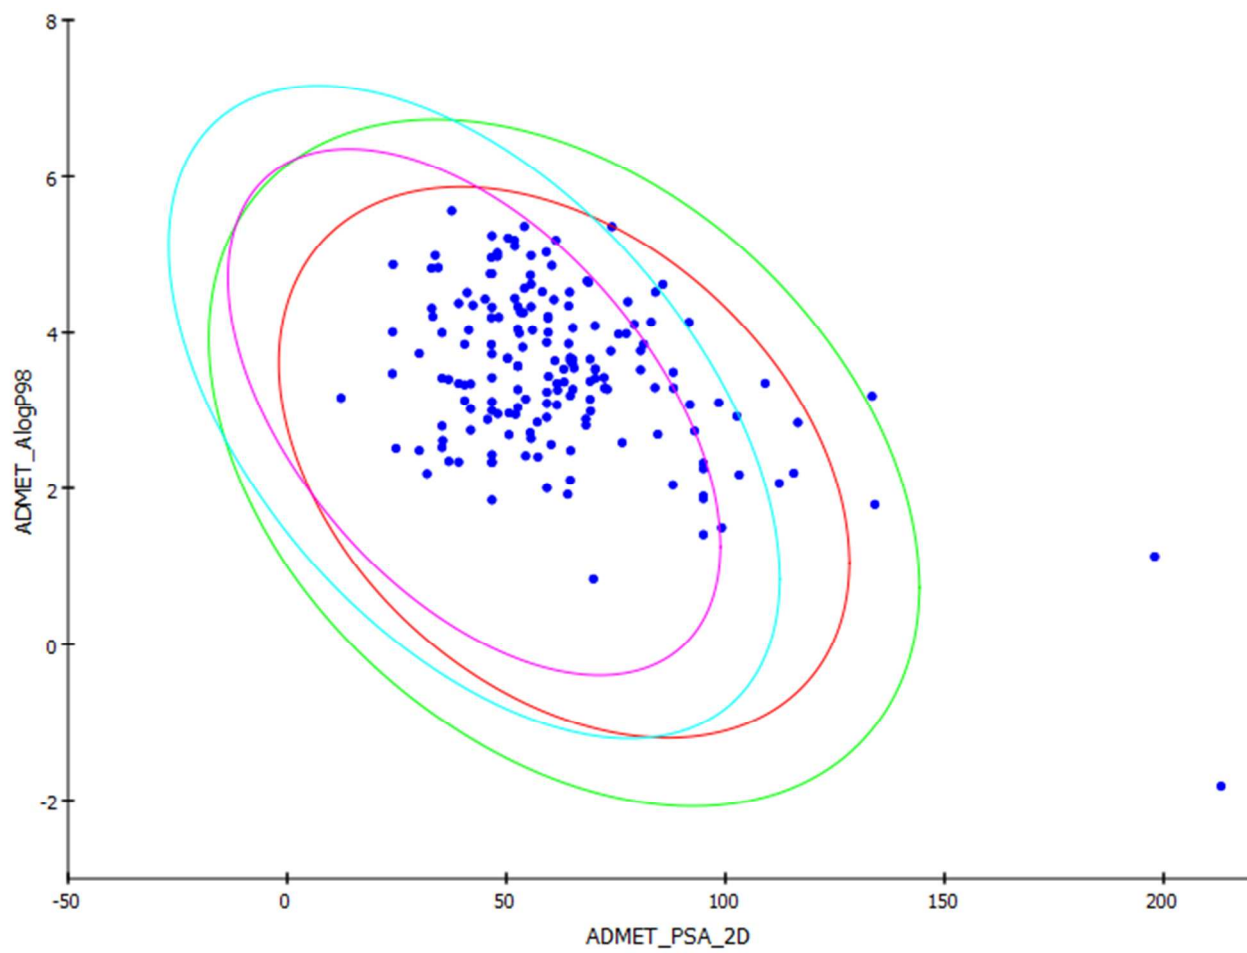

**B.**

## Supplemental References for all molecules in training and test set

### References

1. Makarov, V.; Manina, G.; Mikusova, K.; Mollmann, U.; Ryabova, O.; Saint-Joanis, B.; Dhar, N.; Pasca, M. R.; Buroni, S.; Lucarelli, A. P.; Milano, A.; De Rossi, E.; Belanova, M.; Bobovska, A.; Dianiskova, P.; Kordulakova, J.; Sala, C.; Fullam, E.; Schneider, P.; McKinney, J. D.; Brodin, P.; Christophe, T.; Waddell, S.; Butcher, P.; Albrethsen, J.; Rosenkrands, I.; Brosch, R.; Nandi, V.; Bharath, S.; Gaonkar, S.; Shandil, R. K.; Balasubramanian, V.; Balganes, T.; Tyagi, S.; Grosset, J.; Riccardi, G.; Cole, S. T. Benzothiazinones kill *Mycobacterium tuberculosis* by blocking arabinan synthesis. *Science* **2009**, 324, 801-4.
2. Pethe, K.; Sequeira, P. C.; Agarwalla, S.; Rhee, K.; Kuhen, K.; Phong, W. Y.; Patel, V.; Beer, D.; Walker, J. R.; Duraiswamy, J.; Jiricek, J.; Keller, T. H.; Chatterjee, A.; Tan, M. P.; Ujjini, M.; Rao, S. P.; Camacho, L.; Bifani, P.; Mak, P. A.; Ma, I.; Barnes, S. W.; Chen, Z.; Plouffe, D.; Thayalan, P.; Ng, S. H.; Au, M.; Lee, B. H.; Tan, B. H.; Ravindran, S.; Nanjundappa, M.; Lin, X.; Goh, A.; Lakshminarayana, S. B.; Shoen, C.; Cynamon, M.; Kreiswirth, B.; Dartois, V.; Peters, E. C.; Glynn, R.; Brenner, S.; Dick, T. A chemical genetic screen in *Mycobacterium tuberculosis* identifies carbon-source-dependent growth inhibitors devoid of in vivo efficacy. *Nat Commun* **2010**, 1, 57.
3. Wang, F.; Sambandan, D.; Halder, R.; Wang, J.; Batt, S. M.; Weinrick, B.; Ahmad, I.; Yang, P.; Zhang, Y.; Kim, J.; Hassani, M.; Huszar, S.; Trefzer, C.; Ma, Z.; Kaneko, T.; Mdluli, K. E.; Franzblau, S.; Chatterjee, A. K.; Johnson, K.; Mikusova, K.; Besra, G. S.; Futterer, K.; Jacobs, W. R., Jr.; Schultz, P. G. Identification of a small molecule with activity against drug-resistant and persistent tuberculosis. *Proc Natl Acad Sci U S A* **2013**, 110, E2510-7.
4. Abrahams, K. A.; Cox, J. A.; Spivey, V. L.; Loman, N. J.; Pallen, M. J.; Constantinidou, C.; Fernandez, R.; Alemparte, C.; Remuinan, M. J.; Barros, D.; Ballell, L.; Besra, G. S. Identification of novel imidazo[1,2-a]pyridine inhibitors targeting *M. tuberculosis* QcrB. *PLoS One* **2012**, 7, e52951.
5. Remuinan, M. J.; Perez-Herran, E.; Rullas, J.; Alemparte, C.; Martinez-Hoyos, M.; Dow, D. J.; Afari, J.; Mehta, N.; Esquivias, J.; Jimenez, E.; Ortega-Muro, F.; Fraile-Gabaldon, M. T.; Spivey, V. L.; Loman, N. J.; Pallen, M. J.; Constantinidou, C.; Minick, D. J.; Cacho, M.; Rebollo-Lopez, M. J.; Gonzalez, C.; Sousa, V.; Angulo-Barturen, I.; Mendoza-Losana, A.; Barros, D.; Besra, G. S.; Ballell, L.; Cammack, N. Tetrahydropyrazolo[1,5-a]Pyrimidine-3-Carboxamide and N-Benzyl-6',7'-Dihydrospiro[Piperidine-4,4'-Thieno[3,2-c]Pyran] Analogues with Bactericidal Efficacy against *Mycobacterium tuberculosis* Targeting MmpL3. *PLoS One* **2013**, 8, e60933.
6. Yokokawa, F.; Wang, G.; Chan, W. L.; Ang, S. H.; Wong, J.; Ma, I.; Rao, S. P. S.; Manjunatha, U.; Lakshminarayana, S. B.; Herve, M.; Kounde, C.; Tan, B. H.; Thayalan, P.; Ng, S. H.; Nanjundappa, M.; Ravindran, S.; Gee, P.; Tan, M.; Wei, L.; Goh, A.;

Chen, P.-Y.; Lee, K. S.; Zhong, C.; Wagner, T.; I., D.; A.K., C.; Pethe, K.; Kuhen, K.; Glynne, R.; Smith, P.; Bifani, P.; Jiricek, J. Discovery of tetrahydropyrazolopyrimidine carboxamide derivatives as potent and orally active antitubercular agents. *ACS Med Chem Lett* **2013**, In press.

7. Vicente, E.; Villar, R.; Burguete, A.; Solano, B.; Perez-Silanes, S.; Aldana, I.; Maddry, J. A.; Lenaerts, A. J.; Franzblau, S. G.; Cho, S. H.; Monge, A.; Goldman, R. C. Efficacy of quinoxaline-2-carboxylate 1,4-di-N-oxide derivatives in experimental tuberculosis. *Antimicrob Agents Chemother* **2008**, 52, 3321-6.

8. Villar, R.; Vicente, E.; Solano, B.; Perez-Silanes, S.; Aldana, I.; Maddry, J. A.; Lenaerts, A. J.; Franzblau, S. G.; Cho, S. H.; Monge, A.; Goldman, R. C. In vitro and in vivo antimycobacterial activities of ketone and amide derivatives of quinoxaline 1,4-di-N-oxide. *J Antimicrob Chemother* **2008**, 62, 547-54.

9. Usha, V.; Hobrath, J. V.; Gurcha, S. S.; Reynolds, R. C.; Besra, G. S. Identification of Novel Mt-Guab2 Inhibitor Series Active against *M. tuberculosis*. *PLoS One* **2012**, 7, e33886.

10. Christophe, T.; Jackson, M.; Jeon, H. K.; Fenistein, D.; Contreras-Dominguez, M.; Kim, J.; Genovesio, A.; Carralot, J. P.; Ewann, F.; Kim, E. H.; Lee, S. Y.; Kang, S.; Seo, M. J.; Park, E. J.; Skovierova, H.; Pham, H.; Riccardi, G.; Nam, J. Y.; Marsollier, L.; Kempf, M.; Joly-Guillou, M. L.; Oh, T.; Shin, W. K.; No, Z.; Nehrbass, U.; Brosch, R.; Cole, S. T.; Brodin, P. High content screening identifies decaprenyl-phosphoribose 2' epimerase as a target for intracellular antimycobacterial inhibitors. *PLoS Pathog* **2009**, 5, e1000645.

11. Lun, S.; Guo, H.; Adamson, J.; Cisar, J. S.; Davis, T. D.; Chavadi, S. S.; Warren, J. D.; Quadri, L. E.; Tan, D. S.; Bishai, W. R. Pharmacokinetic and in vivo Efficacy Studies of the Mycobactin Biosynthesis Inhibitor Salicyl-AMS in Mice. *Antimicrob Agents Chemother* **2013**.

12. Hwang, J. M.; Oh, T.; Kaneko, T.; Upton, A. M.; Franzblau, S. G.; Ma, Z.; Cho, S. N.; Kim, P. Design, synthesis, and structure-activity relationship studies of tryptanthrins as antitubercular agents. *J Nat Prod* **2013**, 76, 354-67.

13. Zhang, D.; Lu, Y.; Liu, K.; Liu, B.; Wang, J.; Zhang, G.; Zhang, H.; Liu, Y.; Wang, B.; Zheng, M.; Fu, L.; Hou, Y.; Gong, N.; Lv, Y.; Li, C.; Cooper, C. B.; Upton, A. M.; Yin, D.; Ma, Z.; Huang, H. Identification of less lipophilic riminophenazine derivatives for the treatment of drug-resistant tuberculosis. *J Med Chem* **2012**, 55, 8409-17.

14. Blaser, A.; Palmer, B. D.; Sutherland, H. S.; Kmentova, I.; Franzblau, S. G.; Wan, B.; Wang, Y.; Ma, Z.; Thompson, A. M.; Denny, W. A. Structure-activity relationships for amide-, carbamate-, and urea-linked analogues of the tuberculosis drug (6S)-2-nitro-6-[[4-(trifluoromethoxy)benzyl]oxy]-6,7-dihydro-5H-imidazo[2,1-b][1,3]oxazine (PA-824). *J Med Chem* **2012**, 55, 312-26.

15. Krieger, I. V.; Freundlich, J. S.; Gawandi, V. B.; Roberts, J. P.; Gawandi, V. B.; Sun, Q.; Owen, J. L.; Fraile, M. T.; Huss, S. I.; Lavandera, J. L.; Iøerger, T. R.; Sacchettini, J. C. Structure-guided discovery of phenyl-diketo acids as potent inhibitors of *M. tuberculosis* malate synthase. *Chem Biol* **2012**, *19*, 1556-67.
16. Thompson, A. M.; Sutherland, H. S.; Palmer, B. D.; Kmentova, I.; Blaser, A.; Franzblau, S. G.; Wan, B.; Wang, Y.; Ma, Z.; Denny, W. A. Synthesis and structure-activity relationships of varied ether linker analogues of the antitubercular drug (6S)-2-nitro-6-[[4-(trifluoromethoxy)benzyl]oxy]-6,7-dihydro-5H-imidazo[2,1-b][1, 3]oxazine (PA-824). *J Med Chem* **2011**, *54*, 6563-85.
17. Kmentova, I.; Sutherland, H. S.; Palmer, B. D.; Blaser, A.; Franzblau, S. G.; Wan, B.; Wang, Y.; Ma, Z.; Denny, W. A.; Thompson, A. M. Synthesis and Structure-Activity Relationships of Aza- and Diazabiphenyl Analogues of the Antitubercular Drug (6S)-2-Nitro-6-[[4-(trifluoromethoxy)benzyl]oxy]-6,7-dihydro-5H-imidazo[2,1-b][1, 3]oxazine (PA-824). *J Med Chem* **2010**.
18. Srivastav, N. C.; Rai, D.; Tse, C.; Agrawal, B.; Kunimoto, D. Y.; Kumar, R. Inhibition of mycobacterial replication by pyrimidines possessing various C-5 functionalities and related 2'-deoxynucleoside analogues using in vitro and in vivo models. *J Med Chem* **2010**, *53*, 6180-7.
19. Palmer, B. D.; Thompson, A. M.; Sutherland, H. S.; Blaser, A.; Kmentova, I.; Franzblau, S. G.; Wan, B.; Wang, Y.; Ma, Z.; Denny, W. A. Synthesis and structure-activity studies of biphenyl analogues of the tuberculosis drug (6S)-2-nitro-6-[[4-(trifluoromethoxy)benzyl]oxy]-6,7-dihydro-5H-imidazo[2,1-b][1, 3]oxazine (PA-824). *J Med Chem* **2010**, *53*, 282-94.
20. Sasaki, H.; Haraguchi, Y.; Itotani, M.; Kuroda, H.; Hashizume, H.; Tomishige, T.; Kawasaki, M.; Matsumoto, M.; Komatsu, M.; Tsubouchi, H. Synthesis and antituberculosis activity of a novel series of optically active 6-nitro-2,3-dihydroimidazo[2,1-b]oxazoles. *J Med Chem* **2006**, *49*, 7854-60.
21. Johnson, R. E.; Soria, A. E.; O'Connor, J. R.; Dobson, R. A. Synthesis and antibacterial activity of 1-(arylamino)-1H-pyrroles and 4-(1H-pyrrol-1-ylimino)-2,5-cyclohexadienes. *J Med Chem* **1981**, *24*, 1314-9.
22. Pethe, K.; Bifani, P.; Jang, J.; Kang, S.; Park, S.; Ahn, S.; Jiricek, J.; Jung, J.; Jeon, H. K.; Cechetto, J.; Christophe, T.; Lee, H.; Kempf, M.; Jackson, M.; Lenaerts, A. J.; Pham, H.; Jones, V.; Seo, M. J.; Kim, Y. M.; Seo, M.; Seo, J. J.; Park, D.; Ko, Y.; Choi, I.; Kim, R.; Kim, S. Y.; Lim, S.; Yim, S. A.; Nam, J.; Kang, H.; Kwon, H.; Oh, C. T.; Cho, Y.; Jang, Y.; Kim, J.; Chua, A.; Tan, B. H.; Nanjundappa, M. B.; Rao, S. P.; Barnes, W. S.; Wintjens, R.; Walker, J. R.; Alonso, S.; Lee, S.; Kim, J.; Oh, S.; Oh, T.; Nehrbass, U.; Han, S. J.; No, Z.; Lee, J.; Brodin, P.; Cho, S. N.; Nam, K.; Kim, J. Discovery of Q203, a potent clinical candidate for the treatment of tuberculosis. *Nat Med* **2013**.

23. Stanley, S. A.; Kawate, T.; Iwase, N.; Shimizu, M.; Clatworthy, A. E.; Kazyskaya, E.; Sacchettini, J. C.; Ioerger, T. R.; Siddiqi, N. A.; Minami, S.; Aquadro, J. A.; Schmidt Grant, S.; Rubin, E. J.; Hung, D. T. Diarylcoumarins inhibit mycolic acid biosynthesis and kill *Mycobacterium tuberculosis* by targeting FadD32. *Proc Natl Acad Sci U S A* **2013**, 110, 11565-70.
24. Oleksijew, A.; Meulbroek, J.; Ewing, P.; Jarvis, K.; Mitten, M.; Paige, L.; Tovcimak, A.; Nukkula, M.; Chu, D.; Alder, J. D. In vivo efficacy of ABT-255 against drug-sensitive and -resistant *Mycobacterium tuberculosis* strains. *Antimicrob Agents Chemother* **1998**, 42, 2674-7.
25. Scherman, M. S.; North, E. J.; Jones, V.; Hess, T. N.; Grzegorzewicz, A. E.; Kasagami, T.; Kim, I. H.; Merzlikin, O.; Lenaerts, A. J.; Lee, R. E.; Jackson, M.; Morisseau, C.; McNeil, M. R. Screening a library of 1600 adamantyl ureas for anti-*Mycobacterium tuberculosis* activity in vitro and for better physical chemical properties for bioavailability. *Bioorg Med Chem* **2012**, 20, 3255-62.
26. Xu, J.; Lu, Y.; Fu, L.; Zhu, H.; Wang, B.; Mdluli, K.; Upton, A. M.; Jin, H.; Zheng, M.; Zhao, W.; Li, P. In vitro and in vivo activity of clofazimine against *Mycobacterium tuberculosis* persists. *Int J Tuberc Lung Dis* **2012**, 16, 1119-25.
27. Lu, Y.; Zheng, M.; Wang, B.; Fu, L.; Zhao, W.; Li, P.; Xu, J.; Zhu, H.; Jin, H.; Yin, D.; Huang, H.; Upton, A. M.; Ma, Z. Clofazimine analogs with efficacy against experimental tuberculosis and reduced potential for accumulation. *Antimicrob Agents Chemother* **2011**, 55, 5185-93.
28. Williams, K. N.; Stover, C. K.; Zhu, T.; Tasneen, R.; Tyagi, S.; Grosset, J. H.; Nuermberger, E. Promising antituberculosis activity of the oxazolidinone PNU-100480 relative to that of linezolid in a murine model. *Antimicrob Agents Chemother* **2009**, 53, 1314-9.
29. Shandil, R. K.; Jayaram, R.; Kaur, P.; Gaonkar, S.; Suresh, B. L.; Mahesh, B. N.; Jayashree, R.; Nandi, V.; Bharath, S.; Balasubramanian, V. Moxifloxacin, ofloxacin, sparfloxacin, and ciprofloxacin against *Mycobacterium tuberculosis*: evaluation of in vitro and pharmacodynamic indices that best predict in vivo efficacy. *Antimicrob Agents Chemother* **2007**, 51, 576-82.
30. Lenaerts, A. J.; Bitting, C.; Woolhiser, L.; Gruppo, V.; Marietta, K. S.; Johnson, C. M.; Orme, I. M. Evaluation of a 2-pyridone, KRQ-10018, against *Mycobacterium tuberculosis* in vitro and in vivo. *Antimicrob Agents Chemother* **2008**, 52, 1513-5.
31. Chambers, H. F.; Turner, J.; Schechter, G. F.; Kawamura, M.; Hopewell, P. C. Imipenem for treatment of tuberculosis in mice and humans. *Antimicrob Agents Chemother* **2005**, 49, 2816-21.
32. Lenaerts, A. J.; Gruppo, V.; Marietta, K. S.; Johnson, C. M.; Driscoll, D. K.; Tompkins, N. M.; Rose, J. D.; Reynolds, R. C.; Orme, I. M. Preclinical testing of the

nitroimidazopyran PA-824 for activity against *Mycobacterium tuberculosis* in a series of in vitro and in vivo models. *Antimicrob Agents Chemother* **2005**, 49, 2294-301.

33. Falzari, K.; Zhu, Z.; Pan, D.; Liu, H.; Hongmanee, P.; Franzblau, S. G. In vitro and in vivo activities of macrolide derivatives against *Mycobacterium tuberculosis*. *Antimicrob Agents Chemother* **2005**, 49, 1447-54.

34. Klemens, S. P.; Sharpe, C. A.; Cynamon, M. H. Activity of pyrazinamide in a murine model against *Mycobacterium tuberculosis* isolates with various levels of in vitro susceptibility. *Antimicrob Agents Chemother* **1996**, 40, 14-6.

35. Kelly, B. P.; Furney, S. K.; Jessen, M. T.; Orme, I. M. Low-dose aerosol infection model for testing drugs for efficacy against *Mycobacterium tuberculosis*. *Antimicrob Agents Chemother* **1996**, 40, 2809-12.

36. Lenaerts, A. J.; Gruppo, V.; Brooks, J. V.; Orme, I. M. Rapid in vivo screening of experimental drugs for tuberculosis using gamma interferon gene-disrupted mice. *Antimicrob Agents Chemother* **2003**, 47, 783-5.

37. Dutta, N. K.; Mazumdar, K.; Dastidar, S. G.; Park, J. H. Activity of diclofenac used alone and in combination with streptomycin against *Mycobacterium tuberculosis* in mice. *Int J Antimicrob Agents* **2007**, 30, 336-40.

38. Sharma, A.; Sharma, S.; Khuller, G. K.; Kanwar, A. J. In vitro and ex vivo activity of peptide deformylase inhibitors against *Mycobacterium tuberculosis* H37Rv. *Int J Antimicrob Agents* **2009**, 34, 226-30.

39. Protopopova, M.; Hanrahan, C.; Nikonenko, B.; Samala, R.; Chen, P.; Gearhart, J.; Einck, L.; Nacy, C. A. Identification of a new antitubercular drug candidate, SQ109, from a combinatorial library of 1,2-ethylenediamines. *J Antimicrob Chemother* **2005**, 56, 968-74.

40. Koga, T.; Fukuoka, T.; Doi, N.; Harasaki, T.; Inoue, H.; Hotoda, H.; Kakuta, M.; Muramatsu, Y.; Yamamura, N.; Hoshi, M.; Hirota, T. Activity of capuramycin analogues against *Mycobacterium tuberculosis*, *Mycobacterium avium* and *Mycobacterium intracellulare* in vitro and in vivo. *J Antimicrob Chemother* **2004**, 54, 755-60.

41. Szymanska, E.; Kiec-Kononowicz, K. Antimycobacterial activity of 5-arylidene aromatic derivatives of hydantoin. *Farmaco* **2002**, 57, 355-62.

42. Sanders, W. E., Jr.; Hartwig, C.; Schneider, N.; Cacciatore, R.; Valdez, H. Activity of amikacin against *Mycobacteria* in vitro and in murine tuberculosis. *Tubercle* **1982**, 63, 201-8.

43. Della Bruna, C.; Ungheri, D.; Sebben, G.; Sanfilippo, A. Laboratory evaluation of a new long-acting 3-azinomethylrifamycin FCE 22250. *J Antibiot (Tokyo)* **1985**, 38, 779-86.

44. Toyohara, M. Aspects of the antituberculous activity of 27753-RP, a new semisynthetic derivative of griselimycine. *Ann Inst Pasteur Microbiol* **1987**, 138, 737-44.
45. Matsumoto, M.; Hashizume, H.; Tomishige, T.; Kawasaki, M.; Tsubouchi, H.; Sasaki, H.; Shimokawa, Y.; Komatsu, M. OPC-67683, a nitro-dihydro-imidazooxazole derivative with promising action against tuberculosis in vitro and in mice. *PLoS Med* **2006**, 3, e466.
46. Napier, R. J.; Rafi, W.; Cheruvu, M.; Powell, K. R.; Zaunbrecher, M. A.; Bornmann, W.; Salgame, P.; Shinnick, T. M.; Kalman, D. Imatinib-sensitive tyrosine kinases regulate mycobacterial pathogenesis and represent therapeutic targets against tuberculosis. *Cell Host Microbe* **2011**, 10, 475-85.
47. Butler, S. AZD5847 Oxazolidinone for the treatment of Tuberculosis. In *CPTR Workshop, 2012*, Arlington, VA, 2012.
48. Chopra, S.; Matsuyama, K.; Tran, T.; Malerich, J. P.; Wan, B.; Franzblau, S. G.; Lun, S.; Guo, H.; Maiga, M. C.; Bishai, W. R.; Madrid, P. B. Evaluation of gyrase B as a drug target in Mycobacterium tuberculosis. *J Antimicrob Chemother* **2012**, 67, 415-21.
49. Lu, J.; Yue, J.; Wu, J.; Luo, R.; Hu, Z.; Li, J.; Bai, Y.; Tang, Z.; Xian, Q.; Zhang, X.; Wang, H. In vitro and in vivo activities of a new lead compound I2906 against Mycobacterium tuberculosis. *Pharmacology* **2010**, 85, 365-71.
50. Moraski, G. C.; Chang, M.; Villegas-Estrada, A.; Franzblau, S. G.; Mollmann, U.; Miller, M. J. Structure-activity relationship of new anti-tuberculosis agents derived from oxazoline and oxazole benzyl esters. *Eur J Med Chem* **2010**, 45, 1703-16.
51. van Soolingen, D.; Hernandez-Pando, R.; Orozco, H.; Aguilar, D.; Magis-Escurra, C.; Amaral, L.; van Ingen, J.; Boeree, M. J. The antipsychotic thioridazine shows promising therapeutic activity in a mouse model of multidrug-resistant tuberculosis. *PLoS One* **2010**, 5.
52. Tangallapally, R. P.; Sun, D.; Rakesh; Budha, N.; Lee, R. E.; Lenaerts, A. J.; Meibohm, B.; Lee, R. E. Discovery of novel isoxazolines as anti-tuberculosis agents. *Bioorg Med Chem Lett* **2007**, 17, 6638-42.
53. Sriram, D.; Yogeewari, P.; Dinakaran, M.; Thirumurugan, R. Antimycobacterial activity of novel 1-(5-cyclobutyl-1,3-oxazol-2-yl)-3-(sub)phenyl/pyridylthiourea compounds endowed with high activity toward multidrug-resistant Mycobacterium tuberculosis. *J Antimicrob Chemother* **2007**, 59, 1194-6.
54. Sriram, D.; Yogeewari, P.; Thirumurugan, R.; Pavana, R. K. Discovery of new antitubercular oxazolyl thiosemicarbazones. *J Med Chem* **2006**, 49, 3448-50.
55. Tangallapally, R. P.; Yendapally, R.; Lee, R. E.; Lenaerts, A. J.; Lee, R. E. Synthesis and evaluation of cyclic secondary amine substituted phenyl and benzyl nitrofuranyl amides as novel antituberculosis agents. *J Med Chem* **2005**, 48, 8261-9.



56. Sriram, D.; Aubry, A.; Yogeeswari, P.; Fisher, L. M. Gatifloxacin derivatives: synthesis, antimycobacterial activities, and inhibition of Mycobacterium tuberculosis DNA gyrase. *Bioorg Med Chem Lett* **2006**, 16, 2982-5.
57. Tangallapally, R. P.; Yendapally, R.; Lee, R. E.; Hevener, K.; Jones, V. C.; Lenaerts, A. J.; McNeil, M. R.; Wang, Y.; Franzblau, S.; Lee, R. E. Synthesis and evaluation of nitrofuranyl amides as novel antituberculosis agents. *J Med Chem* **2004**, 47, 5276-83.
58. Senthilkumar, P.; Dinakaran, M.; Banerjee, D.; Devakaram, R. V.; Yogeeswari, P.; China, A.; Nagaraja, V.; Sriram, D. Synthesis and antimycobacterial evaluation of newer 1-cyclopropyl-1,4-dihydro-6-fluoro-7-(substituted secondary amino)-8-methoxy-5-(sub)-4-oxoquinoline-3-carboxylic acids. *Bioorg Med Chem* **2008**, 16, 2558-69.
59. Senthilkumar, P.; Dinakaran, M.; Yogeeswari, P.; Sriram, D.; China, A.; Nagaraja, V. Synthesis and antimycobacterial activities of novel 6-nitroquinolone-3-carboxylic acids. *Eur J Med Chem* **2009**, 44, 345-58.
60. Sriram, D.; Yogeeswari, P.; Basha, J. S.; Radha, D. R.; Nagaraja, V. Synthesis and antimycobacterial evaluation of various 7-substituted ciprofloxacin derivatives. *Bioorg Med Chem* **2005**, 13, 5774-8.
61. Sriram, D.; Yogeeswari, P.; Reddy, S. P. Synthesis of pyrazinamide Mannich bases and its antitubercular properties. *Bioorg Med Chem Lett* **2006**, 16, 2113-6.
62. Sriram, D.; Senthilkumar, P.; Dinakaran, M.; Yogeeswari, P.; China, A.; Nagaraja, V. Antimycobacterial activities of novel 1-(cyclopropyl/tert-butyl/4-fluorophenyl)-1,4-dihydro-6-nitro-4-oxo-7-(substituted secondary amino)-1,8-naphthyridine-3-carboxylic acid. *J Med Chem* **2007**, 50, 6232-9.
63. Sriram, D.; Yogeeswari, P.; Madhu, K. Synthesis and in vitro and in vivo antimycobacterial activity of isonicotinoyl hydrazones. *Bioorg Med Chem Lett* **2005**, 15, 4502-5.
64. Sriram, D.; Yogeeswari, P.; Devakaram, R. V. Synthesis, in vitro and in vivo antimycobacterial activities of diclofenac acid hydrazones and amides. *Bioorg Med Chem* **2006**, 14, 3113-8.
65. Copp, B. R.; Christiansen, H. C.; Lindsay, B. S.; S, G. F. Identification of heteroarylenamines as a new class of antituberculosis lead molecules. *Bioorg Med Chem Lett* **2005**, 15, 4097-9.
66. Dinakaran, M.; Senthilkumar, P.; Yogeeswari, P.; China, A.; Nagaraja, V.; Sriram, D. Antimycobacterial activities of novel 2-(sub)-3-fluoro/nitro-5,12-dihydro-5-oxobenzothiazolo[3,2-a]quinoline-6-carboxylic acid. *Bioorg Med Chem* **2008**, 16, 3408-18.

67. Dinakaran, M.; Senthilkumar, P.; Yogeeswari, P.; China, A.; Nagaraja, V.; Sriram, D. Novel ofloxacin derivatives: synthesis, antimycobacterial and toxicological evaluation. *Bioorg Med Chem Lett* **2008**, 18, 1229-36.
68. Hearn, M. J.; Cynamon, M. H. Design and synthesis of antituberculars: preparation and evaluation against Mycobacterium tuberculosis of an isoniazid Schiff base. *J Antimicrob Chemother* **2004**, 53, 185-91.
69. Kamal, A.; Reddy, K. S.; Ahmed, S. K.; Khan, M. N.; Sinha, R. K.; Yadav, J. S.; Arora, S. K. Anti-tubercular agents. Part 3. Benzothiadiazine as a novel scaffold for anti-Mycobacterium activity. *Bioorg Med Chem* **2006**, 14, 650-8.
70. Kumar, R. R.; Perumal, S.; Senthilkumar, P.; Yogeeswari, P.; Sriram, D. Discovery of antimycobacterial spiro-piperidin-4-ones: an atom economic, stereoselective synthesis, and biological intervention. *J Med Chem* **2008**, 51, 5731-5.
71. Figueiredo, R.; Ramos, D. F.; Moiteiro, C.; Medeiros, M. A.; Marcelo Curto, M. J.; Cardoso de Menezes, J.; Pando, R. H.; Silva, P. E.; Costa Mdo, C. Pharmacophore insights into rpoB gene mutations in Mycobacterium tuberculosis rifampicin resistant isolates. *Eur J Med Chem* **2012**, 47, 186-93.
72. Escribano, J.; Rivero-Hernandez, C.; Rivera, H.; Barros, D.; Castro-Pichel, J.; Perez-Herran, E.; Mendoza-Losana, A.; Angulo-Barturen, I.; Ferrer-Bazaga, S.; Jimenez-Navarro, E.; Ballell, L. 4-Substituted thioquinolines and thiazoloquinolines: potent, selective, and Tween-80 in vitro dependent families of antitubercular agents with moderate in vivo activity. *ChemMedChem* **2011**, 6, 2252-63.
73. Bruhin, H.; Buhlmann, X.; Hook, W. H.; Hoyle, W.; Orford, B.; Vischer, W. Antituberculosis activity of some nitrofurans derivatives. *J Pharm Pharmacol* **1969**, 21, 423-33.
74. Fattorini, L.; Tan, D.; Iona, E.; Mattei, M.; Giannoni, F.; Brunori, L.; Recchia, S.; Orefici, G. Activities of moxifloxacin alone and in combination with other antimicrobial agents against multidrug-resistant Mycobacterium tuberculosis infection in BALB/c mice. *Antimicrob Agents Chemother* **2003**, 47, 360-2.
75. Veziris, N.; Truffot, C.; Mainardi, J. L.; Jarlier, V. Activity of carbapenems combined with clavulanate against murine tuberculosis. *Antimicrob Agents Chemother* **2011**, 55, 2597-600.
76. Plinke, C.; Walter, K.; Aly, S.; Ehlers, S.; Niemann, S. Mycobacterium tuberculosis embB codon 306 mutations confer moderately increased resistance to ethambutol in vitro and in vivo. *Antimicrob Agents Chemother* **2011**, 55, 2891-6.
77. Brooks, J. V.; Furney, S. K.; Orme, I. M. Metronidazole therapy in mice infected with tuberculosis. *Antimicrob Agents Chemother* **1999**, 43, 1285-8.

78. Bogatcheva, E.; Hanrahan, C.; Nikonenko, B.; Samala, R.; Chen, P.; Gearhart, J.; Barbosa, F.; Einck, L.; Nacy, C. A.; Protopopova, M. Identification of new diamine scaffolds with activity against *Mycobacterium tuberculosis*. *J Med Chem* **2006**, *49*, 3045-8.
79. England, K.; Boshoff, H. I.; Arora, K.; Weiner, D.; Dayao, E.; Schimel, D.; Via, L. E.; Barry, C. E., 3rd. Meropenem-clavulanic acid shows activity against *Mycobacterium tuberculosis* in vivo. *Antimicrob Agents Chemother* **2012**, *56*, 3384-7.
80. Poce, G.; Bates, R. H.; Alfonso, S.; Cocozza, M.; Porretta, G. C.; Ballell, L.; Rullas, J.; Ortega, F.; De Logu, A.; Agus, E.; La Rosa, V.; Pasca, M. R.; De Rossi, E.; Wae, B.; Franzblau, S. G.; Manetti, F.; Botta, M.; Biava, M. Improved BM212 MmpL3 inhibitor analogue shows efficacy in acute murine model of tuberculosis infection. *PLoS One* **2013**, *8*, e56980.
81. Marrapu, V. K.; Chaturvedi, V.; Singh, S.; Singh, S.; Sinha, S.; Bhandari, K. Novel aryloxy azolyl chalcones with potent activity against *Mycobacterium tuberculosis* H37Rv. *Eur J Med Chem* **2011**, *46*, 4302-10.
82. Bisht, S. S.; Dwivedi, N.; Chaturvedi, V.; Anand, N.; Misra, M.; Sharma, R.; Kumar, B.; Dwivedi, R.; Singh, S.; Sinha, S. K.; Gupta, V.; Mishra, P. R.; Dwivedi, A. K.; Tripathi, R. P. Synthesis and optimization of antitubercular activities in a series of 4-(aryloxy)phenyl cyclopropyl methanols. *Eur J Med Chem* **2010**, *45*, 5965-78.
83. Nagarajan, K.; Shankar, R. G.; Rajappa, S.; Shenoy, S. J.; Costa-Pereira, R. Nitroimidazoles XXI 2,3-dihydro-6-nitroimidazo [2,1-b] oxazoles with antitubercular activity. *Eur J Med Chem* **1989**, *24*, 631-633.
84. Manna, K.; Agrawal, Y. K. Design, synthesis, and antitubercular evaluation of novel series of 3-benzofuran-5-aryl-1-pyrazolyl-pyridylmethanone and 3-benzofuran-5-aryl-1-pyrazolylcarbonyl-4-oxo-naphthyridin analogs. *Eur J Med Chem* **2010**, *45*, 3831-9.
85. Zhu, Z. J.; Krasnykh, O.; Pan, D.; Petukhova, V.; Yu, G.; Liu, Y.; Liu, H.; Hong, S.; Wang, Y.; Wan, B.; Liang, W.; Franzblau, S. G. Structure-activity relationships of macrolides against *Mycobacterium tuberculosis*. *Tuberculosis (Edinb)* **2008**, *88* Suppl 1, S49-63.
86. LI-3858. *Tuberculosis (Edinb)* **2008**, *88*, 126.
87. Mathew, B.; Srivastava, S.; Ross, L. J.; Suling, W. J.; White, E. L.; Woolhiser, L. K.; Lenaerts, A. J.; Reynolds, R. C. Novel pyridopyrazine and pyrimidothiazine derivatives as FtsZ inhibitors. *Bioorg Med Chem* **2011**, *19*, 7120-8.
88. Urbanski, T. Salicylhydroxamic acid as an antitubercular agent. *Nature* **1950**, *166*, 267-8.

89. Yamane, T.; Hashizume, T.; Yamashita, K.; Konishi, E.; Hosoe, K.; Hidaka, T.; Watanabe, K.; Kawaharada, H.; Yamamoto, T.; Kuze, F. Synthesis and biological activity of 3'-hydroxy-5'-aminobenzoxazinorifamycin derivatives. *Chem Pharm Bull (Tokyo)* **1993**, 41, 148-55.
90. Chylinska, J. B.; Janowiec, M.; Urbanski, T. Antibacterial activity of dihydro-1,3-oxazine derivatives condensed with aromatic rings in positions 5,6. *Br J Pharmacol* **1971**, 43, 649-57.
91. Phillips, O. A.; Udo, E. E.; Varghese, R. Antimycobacterial Activities of Novel 5-(1H-1,2,3-Triazolyl)Methyl Oxazolidinones. *Tuberc Res Treat* **2012**, 2012, 289136.
92. Sanfilippo, A.; Della Bruna, C.; Marsili, L.; Morvillo, E.; Pasqualucci, C. R.; Schioppacassi, G.; Ungheri, D. Biological activity of a new class of rifamycins. Spiropiperidyl-rifamycins. *J Antibiot (Tokyo)* **1980**, 33, 1193-8.
93. Shindikar, A. V.; Viswanathan, C. L. Novel fluoroquinolones: design, synthesis, and in vivo activity in mice against Mycobacterium tuberculosis H37Rv. *Bioorg Med Chem Lett* **2005**, 15, 1803-6.
94. Reddy, V. M.; Nadadhur, G.; Daneluzzi, D.; Dimova, V.; Gangadharam, P. R. Antimycobacterial activity of a new rifamycin derivative, 3-(4-cinnamylpiperazinyl iminomethyl) rifamycin SV (T9). *Antimicrob Agents Chemother* **1995**, 39, 2320-4.
95. Panda, G.; Shagufta; Mishra, J. K.; Chaturvedi, V.; Srivastava, A. K.; Srivastava, R.; Srivastava, B. S. Diaryloxy methano phenanthrenes: a new class of antituberculosis agents. *Bioorg Med Chem* **2004**, 12, 5269-76.
96. Kanyok, T. P.; Reddy, M. V.; Chinnaswamy, J.; Danziger, L. H.; Gangadharam, P. R. In vivo activity of paromomycin against susceptible and multidrug-resistant Mycobacterium tuberculosis and M. avium complex strains. *Antimicrob Agents Chemother* **1994**, 38, 170-3.
97. Byrne, S. T.; Denkin, S. M.; Zhang, Y. Aspirin and ibuprofen enhance pyrazinamide treatment of murine tuberculosis. *J Antimicrob Chemother* **2007**, 59, 313-6.
98. Ahmad, Z.; Sharma, S.; Khuller, G. K. Azole antifungals as novel chemotherapeutic agents against murine tuberculosis. *FEMS Microbiol Lett* **2006**, 261, 181-6.
99. Byrne, S. T.; Denkin, S. M.; Gu, P.; Nuernberger, E.; Zhang, Y. Activity of ketoconazole against Mycobacterium tuberculosis in vitro and in the mouse model. *J Med Microbiol* **2007**, 56, 1047-51.
100. Goodworth, K. J.; Herve, A.-C.; Stavropoulos, E.; Herve, G.; Casades, I.; Hill, A. M.; Weingarten, G. G.; Tascon, R. E.; Colston, M. J.; Hailes, H. C. Synthesis and in vivo

biological activity of large-ringed calixarenes against Mycobacterium tuberculosis. *Tetrahedron* **2011**, 67, 373-382.

101. Ji, B.; Lounis, N.; Maslo, C.; Truffot-Pernot, C.; Bonnafous, P.; Grosset, J. In vitro and in vivo activities of moxifloxacin and clinafloxacin against Mycobacterium tuberculosis. *Antimicrob Agents Chemother* **1998**, 42, 2066-9.

102. Brown, H. D.; Matzuk, A. R.; Becker, H. J.; Conbere, J. P.; Constantin, J. M.; Solotorovsky, M.; Winsten, S.; Ironson, E.; Quastel, J. H. The antituberculosis activity of some ethylmercapto compounds *J Am Chem Soc* **1954**, 3860.

103. Weller, L. E.; Sell, H. M.; Gottshall, R. Y. 3-Indolecarboxaldehyde Thiosemicarbazone, a New Antitubercular Compound. *J Am Chem Soc* **1954**, 76, 1959.

104. Doyle, F. P.; Ferrier, W.; Holland, D. O.; Mehta, M. D.; Nayler, J. H. C. Potential Antituberculosis Agents of the Indole Series. *Journal of the Chemical Society* **1956**, 2853-2857.

105. Kushner, S.; Dalalian, H.; Bach, F. L. J.; Centola, D.; Sanjurjo, J. L.; Williams, J. H. Experimental Chemotherapy of Tuberculosis. 111. Ethyl Mercaptan and Related Compounds in Tuberculosis. *J Am Chem Soc* **1955**, 77, 1152-1155.

106. Adams, E. P.; Doyle, F. P.; Hatt, D. L.; Holland, D. O.; Hunter, W. H.; Mansford, K. R. L.; Nayler, J. H. C.; Queen, A. 531. Antituberculous sulphur compounds. Part I. New mercapto-derivatives of alkanols, sulphides, and hydroxy-sulphides *Journal of the Chemical Society* **1960**, 2649-2659.

107. Kondreddi, R. R.; Jiricek, J.; Rao, S. P.; Lakshminarayana, S. B.; Camacho, L. R.; Rao, R.; Herve, M.; Bifani, P.; Ma, N. L.; Kuhen, K.; Goh, A.; Chatterjee, A. K.; Dick, T.; Diagana, T. T.; Manjunatha, U. H.; Smith, P. W. Design, synthesis and biological evaluation of indole-2-carboxamides, a promising class of anti-tuberculosis agents. *J Med Chem* **2013**.

108. Hameed, S. P.; Solapure, S.; Mukherjee, K.; Nandi, V.; Waterson, D.; Shandil, R.; Balganes, M.; Sambandamurthy, V. K.; Raichurkar, A. K.; Deshpande, A.; Ghosh, A.; Awasthy, D.; Shanbhag, G.; Sheikh, G.; McMiken, H.; Puttur, J.; Reddy, J.; Werngren, J.; Read, J.; Kumar, M.; R, M.; Chinnapattu, M.; Madhavapeddi, P.; Manjrekar, P.; Basu, R.; Gaonkar, S.; Sharma, S.; Hoffner, S.; Humnabadkar, V.; Subbulakshmi, V.; Panduga, V. Optimization of pyrrolamides as mycobacterial GyrB ATPase inhibitors: Structure Activity Relationship and in vivo efficacy in the mouse model of tuberculosis. *Antimicrob Agents Chemother* **2013**.

109. Acred, P.; Brown, D. M. The antitubercular properties of a series of thiols and sulphides. *Br J Pharmacol Chemother* **1960**, 15, 485-95.

110. Blomquist, A.; Wolinsky, J. Addition of Ethyl Mercaptan to Acetylenic Compounds. *J Org Chem* **1958**, 23, 551-554.

111. Caldwell, W.; Nuri, S. The Preparation of a Pyrimidine Analog (Isostere) of Promizole and Other Substituted Pyrimidines. *J Am Chem Soc* **1952**, 74, 4314-4317.
112. Hoggarth, E.; Martin, A. R. Studies in the chemotherapy of tuberculosis; sulphones. *Br J Pharmacol Chemother* **1948**, 3, 146-52.
113. Davies, G. E.; Driver, G. W.; Hoggarth, E.; Martin, A. R.; Paige, M. F.; Rose, F. L.; Wilson, B. R. Studies in the chemotherapy of tuberculosis: ethyl mercaptan and related compounds. *Br J Pharmacol Chemother* **1956**, 11, 351-6.
114. Hoggarth, E.; Martin, A. R.; Young, E. H. Studies in the chemotherapy of tuberculosis; sulphonamides. *Br J Pharmacol Chemother* **1948**, 3, 153-5.
115. Nardi, D.; Massarani, E.; Pozzi, R.; Degen, L. Antibacterial nitrofurans derivatives. 4. 5-Nitro-2-furaldehyde hydrazone derivatives. *J Med Chem* **1971**, 14, 990-2.
116. Youmans, G. P.; Doub, I.; Youmans, A. S. *The bacteriostatic activity of 3500 organic compounds for Mycobacterium Tuberculosis Var. Hominis*; National Research Council: 1953.
117. Ellis, S.; Kalinowski, D. S.; Leotta, L.; Huang, M. L.; Jelfs, P.; Sintchenko, V.; Richardson, D. R.; Triccas, J. A. Potent Anti-Mycobacterial Activity of the Pyridoxal Isonicotinoyl Hydrazone Analogue, 2-Pyridylcarboxaldehyde Isonicotinoyl Hydrazone: A Lipophilic Transport Vehicle for Isonicotinic Acid Hydrazone. *Mol Pharmacol* **2013**.
118. Shirude, P. S.; Shandil, R.; Sadler, C.; Naik, M.; Hosagrahara, V.; Hameed, S.; Shinde, V.; Bathula, C.; Humnabadkar, V.; Kumar, N.; Reddy, J.; Panduga, V.; Sharma, S.; Ambady, A.; Hegde, N.; Whiteaker, J.; McLaughlin, R. E.; Gardner, H.; Madhavapeddi, P.; Ramachandran, V.; Kaur, P.; Narayan, A.; Guptha, S.; Awasthy, D.; Narayan, C.; Mahadevaswamy, J.; Vishwas, K.; Ahuja, V.; Srivastava, A.; Prabhakar, K.; Bharath, S.; Kale, R.; Ramaiah, M.; Choudhury, N. R.; Sambandamurthy, V. K.; Solapure, S.; Iyer, P. S.; Narayanan, S.; Chatterji, M. Azaindoles: Noncovalent DprE1 Inhibitors from Scaffold Morphing Efforts, Kill Mycobacterium tuberculosis and Are Efficacious in Vivo. *J Med Chem* **2013**.
119. Lun, S.; Guo, H.; Onajole, O. K.; Pieroni, M.; Gunosewoyo, H.; Chen, G.; Tipparaju, S. K.; Ammerman, N. C.; Kozikowski, A. P.; Bishai, W. R. Indoleamides are active against drug-resistant Mycobacterium tuberculosis. *Nat Commun* **2013**, 4, 2907.
